# Supplementary material for: Aliphatic carbonyl compounds (C 8 –C 26 ) in wintertime atmospheric aerosol in London, UK
Source: Copernicus journal article supplement (doi:10.5194/acp-19-2233-2019), 2019-02-20
Supplement: Supplementary file 1 [file acp-19-2233-2019-supplement.pdf]

Supplement of Atmos. Chem. Phys., 19, 2233–2246, 2019  
<https://doi.org/10.5194/acp-19-2233-2019-supplement>  
© Author(s) 2019. This work is distributed under  
the Creative Commons Attribution 4.0 License.

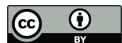

*Supplement of*

## **Aliphatic carbonyl compounds (C<sub>8</sub>–C<sub>26</sub>) in wintertime atmospheric aerosol in London, UK**

**Ruihe Lyu et al.**

*Correspondence to:* Roy M. Harrison ([r.m.harrison@bham.ac.uk](mailto:r.m.harrison@bham.ac.uk))

The copyright of individual parts of the supplement might differ from the CC BY 4.0 License.

1 **Table S1:** Detection limit of gaseous (G) and particle (P) carbonyl compounds.

| Carbon number   | n-Alkanals             | DL, ng m <sup>-3</sup> |       | n-Alkan-2-ones             | DL, ng m <sup>-3</sup> |       | n-Alkan-3-ones             | DL, ng m <sup>-3</sup> |       |
|-----------------|------------------------|------------------------|-------|----------------------------|------------------------|-------|----------------------------|------------------------|-------|
|                 |                        | G                      | P     |                            | G                      | P     |                            | G                      | P     |
| C <sub>8</sub>  | <i>n</i> -Octanal      | 0.013                  | 0.008 | <i>n</i> -Octan-2-one      | 0.015                  | 0.011 | <i>n</i> -Octan-3-one      | 0.010                  | 0.008 |
| C <sub>9</sub>  | <i>n</i> -Nonanal      | 0.011                  | 0.015 | <i>n</i> -Nonan-2-one      | 0.010                  | 0.008 | <i>n</i> -Nonan-3-one      | 0.007                  | 0.002 |
| C <sub>10</sub> | <i>n</i> -Decanal      | 0.016                  | 0.002 | <i>n</i> -Decan-2-one      | 0.007                  | 0.005 | <i>n</i> -Decan-3-one      | 0.005                  | 0.003 |
| C <sub>11</sub> | <i>n</i> -Undecanal    | 0.015                  | 0.010 | <i>n</i> -Undecan-2-one    | 0.002                  | 0.009 | <i>n</i> -Undecan-3-one    | 0.005                  | 0.003 |
| C <sub>12</sub> | <i>n</i> -Dodecanal    | 0.010                  | 0.006 | <i>n</i> -Dodecan-2-one    | 0.005                  | 0.001 | <i>n</i> -Dodecan-3-one    | 0.009                  | 0.001 |
| C <sub>13</sub> | <i>n</i> -Tridecanal   | 0.010                  | 0.009 | <i>n</i> -Tridecan-2-one   | 0.008                  | 0.004 | <i>n</i> -Tridecan-3-one   | 0.008                  | 0.002 |
| C <sub>14</sub> | <i>n</i> -Tetradecanal | 0.008                  | 0.013 | <i>n</i> -Tetradecan-2-one | 0.015                  | 0.006 | <i>n</i> -Tetradecan-3-one | 0.010                  | 0.005 |
| C <sub>15</sub> | <i>n</i> -Pentadecanal | 0.015                  | 0.005 | <i>n</i> -Pentadecan-2-one | 0.013                  | 0.002 | <i>n</i> -Pentadecan-3-one | 0.009                  | 0.003 |
| C <sub>16</sub> | <i>n</i> -Hexadecanal  | 0.020                  | 0.015 | <i>n</i> -Hexadecan-2-one  | 0.006                  | 0.001 | <i>n</i> -Hexadecan-3-one  | 0.015                  | 0.007 |
| C <sub>17</sub> | <i>n</i> -Heptadecanal | 0.021                  | 0.012 | <i>n</i> -Heptadecan-2-one | 0.008                  | 0.004 | <i>n</i> -Heptadecan-3-one | 0.009                  | 0.004 |
| C <sub>18</sub> | <i>n</i> -Octadecanal  | 0.014                  | 0.007 | <i>n</i> -Octadecan-2-one  | 0.011                  | 0.012 | <i>n</i> -Octadecan-3-one  | 0.008                  | 0.003 |
| C <sub>19</sub> | <i>n</i> -Nonadecanal  | 0.010                  | 0.016 | <i>n</i> -Nonadecan-2-one  | 0.020                  | 0.006 | <i>n</i> -Nonadecan-3-one  | 0.012                  | 0.005 |
| C <sub>20</sub> | <i>n</i> -Eicosanal    | 0.019                  | 0.015 | <i>n</i> -Eicosan-2-one    | 0.018                  | 0.009 |                            |                        |       |
| C <sub>21</sub> |                        |                        |       | <i>n</i> -Heneicosan-2-one | 0.022                  | 0.006 |                            |                        |       |
| C <sub>22</sub> |                        |                        |       | <i>n</i> -Docosan-2-one    | 0.014                  | 0.010 |                            |                        |       |
| C <sub>23</sub> |                        |                        |       | <i>n</i> -Tricosan-2-one   | 0.017                  | 0.011 |                            |                        |       |
| C <sub>24</sub> |                        |                        |       | <i>n</i> -Tetracosan-2-one | 0.010                  | 0.015 |                            |                        |       |
| C <sub>25</sub> |                        |                        |       | <i>n</i> -Pentacosan-2-one | 0.016                  | 0.020 |                            |                        |       |
| C <sub>26</sub> |                        |                        |       | <i>n</i> -Hexacosan-2-one  | 0.021                  | 0.015 |                            |                        |       |

2

3 Table S2. Concentrations (ng m<sup>-3</sup>) in particulate (P) and gaseous (G) forms

| RU (Regent University, 15 m above ground, 23 Jan - 19 Feb 2017) |            |      |            |      |                |      |                |      |                |      |                |      |
|-----------------------------------------------------------------|------------|------|------------|------|----------------|------|----------------|------|----------------|------|----------------|------|
|                                                                 | n-alkanals |      | n-alkanals |      | n-alkan-2-ones |      | n-alkan-2-ones |      | n-alkan-3-ones |      | n-alkan-3-ones |      |
|                                                                 | P          | SD   | G          | SD   | P              | SD   | G              | SD   | P              | SD   | G              | SD   |
| C <sub>8</sub>                                                  | 28.6       | 10.9 |            |      | 0.97           | 0.64 |                |      | 0.62           | 0.58 |                |      |
| C <sub>9</sub>                                                  | 11.6       | 6.07 |            |      | 0.72           | 0.58 |                |      | 0.27           | 0.14 |                |      |
| C <sub>10</sub>                                                 | 9.11       | 5.06 | 2.99       | 2.47 | 0.69           | 0.57 | 4.37           | 2.46 | 0.13           | 0.09 | 1.62           | 1.08 |
| C <sub>11</sub>                                                 | 1.32       | 0.81 | 1.58       | 1.05 | 0.84           | 0.61 | 3.09           | 1.80 | 0.12           | 0.13 | 0.82           | 0.66 |
| C <sub>12</sub>                                                 | 2.73       | 1.50 | 0.92       | 0.59 | 0.67           | 0.54 | 2.01           | 1.47 | 0.26           | 0.39 | 0.57           | 0.45 |
| C <sub>13</sub>                                                 | 1.45       | 0.98 | 0.39       | 0.35 | 1.41           | 1.01 | 0.90           | 0.79 | 0.23           | 0.21 | 0.42           | 0.33 |
| C <sub>14</sub>                                                 | 1.73       | 1.08 | 0.50       | 0.40 | 1.07           | 0.74 | 1.09           | 0.92 | 0.22           | 0.23 | 0.40           | 0.28 |
| C <sub>15</sub>                                                 | 2.10       | 1.41 | 0.11       | 0.13 | 2.33           | 1.31 | 0.44           | 0.35 | 0.48           | 0.49 | 0.47           | 0.38 |
| C <sub>16</sub>                                                 | 1.98       | 1.21 |            |      | 2.23           | 1.35 | 0.21           | 0.18 | 0.85           | 0.60 | 0.36           | 0.20 |
| C <sub>17</sub>                                                 | 1.20       | 0.86 |            |      | 6.63           | 3.13 | 0.62           | 0.51 | 1.72           | 0.97 |                |      |
| C <sub>18</sub>                                                 | 16.1       | 9.19 |            |      | 7.17           | 3.41 | 0.45           | 0.33 | 0.83           | 0.48 |                |      |
| C <sub>19</sub>                                                 | 4.48       | 3.92 |            |      | 9.03           | 3.86 |                |      |                |      |                |      |
| C <sub>20</sub>                                                 | 1.48       | 1.19 |            |      | 6.21           | 3.12 |                |      |                |      |                |      |
| C <sub>21</sub>                                                 |            |      |            |      | 5.88           | 3.35 |                |      |                |      |                |      |
| C <sub>22</sub>                                                 |            |      |            |      | 4.21           | 3.05 |                |      |                |      |                |      |
| C <sub>23</sub>                                                 |            |      |            |      | 3.13           | 2.35 |                |      |                |      |                |      |
| C <sub>24</sub>                                                 |            |      |            |      | 2.51           | 1.98 |                |      |                |      |                |      |
| C <sub>25</sub>                                                 |            |      |            |      | 1.80           | 1.59 |                |      |                |      |                |      |
| C <sub>26</sub>                                                 |            |      |            |      | 1.02           | 1.06 |                |      |                |      |                |      |

| WM (Westminster University, 20 m above ground, 24 Jan - 20 Feb 2017) |            |      |            |      |                |      |                |      |                |      |                |      |
|----------------------------------------------------------------------|------------|------|------------|------|----------------|------|----------------|------|----------------|------|----------------|------|
|                                                                      | n-alkanals |      | n-alkanals |      | n-alkan-2-ones |      | n-alkan-2-ones |      | n-alkan-3-ones |      | n-alkan-3-ones |      |
|                                                                      | P          | SD   | G          | SD   | P              | SD   | G              | SD   | P              | SD   | G              | SD   |
| C <sub>8</sub>                                                       | 50.3       | 18.7 |            |      | 0.94           | 0.66 |                |      | 1.47           | 1.05 |                |      |
| C <sub>9</sub>                                                       | 12.6       | 6.64 |            |      | 0.85           | 0.80 |                |      | 0.81           | 0.71 |                |      |
| C <sub>10</sub>                                                      | 12.7       | 6.97 | 2.76       | 1.82 | 0.74           | 0.60 | 4.41           | 2.32 | 0.62           | 0.45 | 2.04           | 1.15 |
| C <sub>11</sub>                                                      | 1.74       | 1.53 | 1.05       | 0.89 | 0.81           | 0.69 | 3.22           | 2.31 | 0.62           | 0.61 | 1.09           | 0.76 |
| C <sub>12</sub>                                                      | 3.87       | 2.92 | 1.38       | 0.81 | 0.57           | 0.54 | 1.41           | 0.87 | 0.20           | 0.19 | 0.68           | 0.56 |
| C <sub>13</sub>                                                      | 2.26       | 1.53 | 0.49       | 0.45 | 1.29           | 1.04 | 1.35           | 1.02 | 0.50           | 0.43 | 0.30           | 0.25 |
| C <sub>14</sub>                                                      | 2.73       | 1.78 | 0.87       | 0.71 | 0.75           | 0.81 | 1.61           | 0.97 | 0.20           | 0.16 | 0.58           | 0.36 |
| C <sub>15</sub>                                                      | 3.51       | 2.92 |            |      | 2.89           | 2.06 | 0.51           | 0.33 | 0.89           | 0.52 | 0.41           | 0.23 |
| C <sub>16</sub>                                                      | 2.62       | 2.02 |            |      | 2.84           | 2.15 | 0.33           | 0.29 | 1.21           | 0.64 | 0.11           | 0.17 |
| C <sub>17</sub>                                                      | 1.42       | 1.03 |            |      | 5.16           | 4.40 | 0.85           | 0.68 | 2.05           | 1.15 | 0.19           | 0.30 |
| C <sub>18</sub>                                                      | 17.8       | 11.0 |            |      | 5.37           | 4.32 | 0.96           | 0.73 | 1.79           | 1.51 | 0.01           | 0.08 |
| C <sub>19</sub>                                                      | 2.65       | 2.02 |            |      | 5.98           | 4.98 |                |      |                |      |                |      |
| C <sub>20</sub>                                                      | 3.34       | 2.66 |            |      | 8.26           | 6.93 |                |      |                |      |                |      |
| C <sub>21</sub>                                                      |            |      |            |      | 6.02           | 5.46 |                |      |                |      |                |      |
| C <sub>22</sub>                                                      |            |      |            |      | 5.61           | 5.53 |                |      |                |      |                |      |
| C <sub>23</sub>                                                      |            |      |            |      | 2.76           | 3.11 |                |      |                |      |                |      |
| C <sub>24</sub>                                                      |            |      |            |      | 2.14           | 2.19 |                |      |                |      |                |      |
| C <sub>25</sub>                                                      |            |      |            |      | 1.17           | 1.18 |                |      |                |      |                |      |

C<sub>26</sub>

1.01

1.13

EL (Eltham, 23 Feb - 21 Mar 2017)

|                 | n-alkanals |      | n-alkanals |      | n-alkan-2-ones |      | n-alkan-2-ones |      | n-alkan-3-ones |      | n-alkan-3-ones |      |
|-----------------|------------|------|------------|------|----------------|------|----------------|------|----------------|------|----------------|------|
|                 | P          | SD   | G          | SD   | P              | SD   | G              | SD   | P              | SD   | G              | SD   |
| C <sub>8</sub>  | 53.0       | 22.5 |            |      | 1.66           | 0.94 |                |      | 1.10           | 0.91 |                |      |
| C <sub>9</sub>  | 27.6       | 21.5 |            |      | 1.81           | 1.93 |                |      | 0.92           | 0.99 |                |      |
| C <sub>10</sub> | 19.3       | 11.6 | 2.02       | 0.96 | 2.56           | 3.28 | 2.82           | 1.66 | 1.01           | 0.79 | 1.14           | 0.66 |
| C <sub>11</sub> | 4.56       | 4.72 | 0.68       | 0.51 | 3.81           | 4.51 | 1.46           | 0.95 | 1.31           | 1.15 | 0.80           | 0.29 |
| C <sub>12</sub> | 6.75       | 7.02 | 0.52       | 0.49 | 4.76           | 6.24 | 0.95           | 0.73 | 0.73           | 0.95 | 0.37           | 0.27 |
| C <sub>13</sub> | 4.75       | 3.43 | 0.22       | 0.16 | 5.44           | 6.32 | 0.88           | 0.65 | 0.90           | 0.92 | 0.47           | 0.32 |
| C <sub>14</sub> | 3.94       | 2.43 | 0.37       | 0.36 | 4.07           | 3.30 | 0.68           | 0.53 | 0.52           | 0.54 | 0.36           | 0.30 |
| C <sub>15</sub> | 6.22       | 4.05 | 0.21       | 0.19 | 6.30           | 4.27 | 0.37           | 0.30 | 1.84           | 1.19 | 0.34           | 0.27 |
| C <sub>16</sub> | 3.29       | 2.92 |            |      | 6.41           | 3.28 | 0.40           | 0.28 | 2.66           | 1.69 | 0.33           | 0.24 |
| C <sub>17</sub> | 5.03       | 4.91 |            |      | 10.9           | 5.82 | 0.45           | 0.42 | 1.98           | 1.32 | 0.45           | 0.19 |
| C <sub>18</sub> | 22.6       | 18.3 |            |      | 1.56           | 6.16 | 0.45           | 0.31 | 2.26           | 1.48 | 0.40           | 0.57 |
| C <sub>19</sub> | 7.46       | 4.58 |            |      | 11.9           | 11.2 |                |      |                |      |                |      |
| C <sub>20</sub> | 5.05       | 4.10 |            |      | 8.96           | 7.75 |                |      |                |      |                |      |
| C <sub>21</sub> |            |      |            |      | 15.2           | 7.22 |                |      |                |      |                |      |
| C <sub>22</sub> |            |      |            |      | 11.1           | 7.34 |                |      |                |      |                |      |
| C <sub>23</sub> |            |      |            |      | 13.0           | 9.38 |                |      |                |      |                |      |
| C <sub>24</sub> |            |      |            |      | 6.84           | 6.17 |                |      |                |      |                |      |

MR (Marylebone road, 22 Mar - 18 Apr 2017)

|                 | n-alkanals |      | n-alkanals |      | n-alkan-2-ones |      | n-alkan-2-ones |      | n-alkan-3-ones |      | n-alkan-3-ones |      |
|-----------------|------------|------|------------|------|----------------|------|----------------|------|----------------|------|----------------|------|
|                 | P          | SD   | G          | SD   | P              | SD   | G              | SD   | P              | SD   | G              | SD   |
| C <sub>8</sub>  | 141        | 68.8 |            |      | 4.22           | 3.44 |                |      | 2.89           | 1.54 |                |      |
| C <sub>9</sub>  | 126        | 74.7 |            |      | 3.35           | 2.88 |                |      | 1.76           | 1.69 |                |      |
| C <sub>10</sub> | 99.9       | 46.6 | 8.99       | 4.16 | 12.1           | 5.21 | 7.72           | 3.67 | 0.80           | 0.74 | 3.13           | 1.76 |
| C <sub>11</sub> | 26.0       | 13.5 | 3.76       | 2.93 | 4.69           | 3.96 | 4.66           | 2.42 | 0.88           | 0.64 | 1.78           | 0.56 |
| C <sub>12</sub> | 38.6       | 22.3 | 2.92       | 2.52 | 22.3           | 8.02 | 2.90           | 1.71 | 0.63           | 0.50 | 1.61           | 0.39 |
| C <sub>13</sub> | 36.0       | 20.1 | 1.46       | 1.08 | 11.7           | 4.06 | 1.64           | 0.92 | 1.38           | 1.09 | 1.61           | 0.38 |
| C <sub>14</sub> | 35.6       | 17.0 | 1.78       | 1.61 | 41.6           | 12.7 | 1.78           | 0.91 | 3.29           | 2.38 | 1.28           | 0.49 |
| C <sub>15</sub> | 76.1       | 30.0 |            |      | 23.6           | 10.3 | 0.75           | 0.40 | 6.31           | 2.84 | 1.22           | 0.29 |
| C <sub>16</sub> | 41.0       | 22.5 |            |      | 14.4           | 7.90 | 0.54           | 0.25 | 7.53           | 3.70 | 1.03           | 0.24 |
| C <sub>17</sub> | 21.9       | 11.7 |            |      | 14.0           | 7.12 | 0.59           | 0.46 | 5.64           | 3.52 | 0.77           | 0.18 |
| C <sub>18</sub> | 10.7       | 8.76 |            |      | 9.68           | 6.61 | 0.78           | 0.62 | 4.64           | 2.82 | 0.63           | 0.23 |
| C <sub>19</sub> | 17.5       | 10.7 |            |      | 3.56           | 2.93 |                |      | 4.35           | 1.91 |                |      |
| C <sub>20</sub> | 5.47       | 4.28 |            |      | 7.78           | 6.17 |                |      |                |      |                |      |
| C <sub>21</sub> |            |      |            |      | 4.01           | 4.41 |                |      |                |      |                |      |
| C <sub>22</sub> |            |      |            |      | 5.12           | 4.40 |                |      |                |      |                |      |
| C <sub>23</sub> |            |      |            |      | 2.65           | 2.73 |                |      |                |      |                |      |
| C <sub>24</sub> |            |      |            |      | 5.89           | 4.71 |                |      |                |      |                |      |

5 Table S3. The ratios of n-alkan-2-ones/n-alkanes, and n-alkan-3-ones/n-alkanes with same carbon  
 6 numbers (particles plus vapour).  
 7

| n-alkan-2-ones/n-alkanes, % |      |      |      |                 |                 |
|-----------------------------|------|------|------|-----------------|-----------------|
| Carbon numbers              | RU   | WM   | EL   | MR              |                 |
|                             |      |      |      | Northerly winds | Southerly winds |
| C13                         | 2.31 | 1.86 | 2.14 | 6.02            | 6.34            |
| C14                         | 2.03 | 1.58 | 2.38 | 20.8            | 15.9            |
| C15                         | 4.17 | 4.77 | 5.95 | 11.3            | 13.6            |
| C16                         | 7.35 | 5.98 | 8.58 | 11.8            | 7.27            |
| C17                         | 48.9 | 29.8 | 31.7 | 27.0            | 24.6            |
| C18                         | 32.5 | 18.2 | 31.3 | 23.4            | 18.1            |
| C19                         | 77.8 | 33.9 | 43.2 | 19.6            | 14.7            |
| C20                         | 379  | 168  | 33.3 | 32.8            | 10.1            |
| C21                         | 267  | 59.3 | 33.1 | 10.4            | 3.18            |
| C22                         | 144  | 36.1 | 18.6 | 4.76            | 5.29            |
| C23                         | 17.1 | 6.61 | 10.5 | 1.75            | 3.41            |
| C24                         | 17.1 | 7.16 | 11.3 | 3.31            | 5.62            |
| C25                         | 26.5 | 4.24 |      |                 |                 |
| C26                         | 18.3 | 3.36 |      |                 |                 |
| <b>averages</b>             | 74.7 | 27.2 | 19.3 | 14.4            | 10.1            |
| <b>min</b>                  | 2.03 | 1.58 | 2.14 | 1.75            | 3.18            |
| <b>max</b>                  | 379  | 168  | 43.2 | 32.8            | 24.6            |

8

| n-alkan-3-ones/n-alkanes, % |      |      |      |                 |                 |
|-----------------------------|------|------|------|-----------------|-----------------|
| Carbon numbers              | RU   | WM   | EL   | MR              |                 |
|                             |      |      |      | Northerly winds | Southerly winds |
| C13                         | 0.70 | 0.50 | 0.49 | 1.30            | 1.39            |
| C14                         | 0.58 | 0.50 | 0.47 | 2.10            | 1.73            |
| C15                         | 1.31 | 1.51 | 2.15 | 5.22            | 3.58            |
| C16                         | 3.80 | 1.73 | 3.87 | 14.9            | 4.44            |
| C17                         | 12.4 | 7.17 | 8.39 | 15.7            | 8.58            |
| C18                         | 3.78 | 3.87 | 7.61 | 11.1            | 3.59            |
| C19                         |      |      |      | 7.65            | 8.27            |
| <b>averages</b>             | 3.76 | 2.55 | 3.83 | 8.28            | 4.51            |
| <b>min</b>                  | 0.58 | 0.50 | 0.47 | 1.30            | 1.39            |
| <b>max</b>                  | 12.4 | 7.17 | 8.39 | 15.7            | 8.58            |

9

10

11

12

13 Table S4. The regression equations between black carbon (BC) and n-alkanals, NO<sub>x</sub> and n-alkanals  
 14 (particles + vapour).

15  
 16  $C_{n\text{-alkanals}} = m C_{BC} + b$

| Carbon atoms   | RU    |      |                | WM    |      |                | MR              |      |                |                 |       |                |
|----------------|-------|------|----------------|-------|------|----------------|-----------------|------|----------------|-----------------|-------|----------------|
|                | m     | b    | r <sup>2</sup> | m     | b    | r <sup>2</sup> | Northerly Winds |      |                | Southerly winds |       |                |
|                |       |      |                |       |      |                | m               | b    | r <sup>2</sup> | m               | b     | r <sup>2</sup> |
| C10            | -2.00 | 14.5 | 0.02           | -1.55 | 18.3 | 0.02           | 4.39            | 95.7 | 0.05           | 36.2            | -48.8 | 0.53           |
| C11            | 0.11  | 2.28 | 0.00           | -0.18 | 3.25 | 0.01           | -0.33           | 27.4 | 0.02           | 12.6            | -25.2 | 0.57           |
| C12            | -1.25 | 5.23 | 0.11           | -0.17 | 5.84 | 0.00           | 2.17            | 30.1 | 0.02           | 20.7            | -47.3 | 0.56           |
| C13            | -0.10 | 1.87 | 0.00           | 0.01  | 2.84 | 0.00           | -4.36           | 46.7 | 0.09           | 12.6            | -12.7 | 0.58           |
| C14            | -0.23 | 2.48 | 0.02           | 0.11  | 3.60 | 0.00           | 6.37            | 19.5 | 0.18           | 9.57            | -0.65 | 0.49           |
| C15            | -0.33 | 2.57 | 0.01           | -0.69 | 5.25 | 0.02           | 6.59            | 57.0 | 0.12           | 18.3            | 5.08  | 0.43           |
| C16            | 0.85  | 0.81 | 0.09           | -0.01 | 2.75 | 0.00           | 5.57            | 29.6 | 0.08           | 8.18            | 9.85  | 0.28           |
| C17            | -0.35 | 1.66 | 0.04           | 0.05  | 1.33 | 0.00           | 4.73            | 4.67 | 0.31           | 5.79            | 0.94  | 0.35           |
| C18            | -6.42 | 25.2 | 0.10           | -1.90 | 21.7 | 0.01           | 0.81            | 6.19 | 0.03           | 8.61            | -26.2 | 0.44           |
| C19            | -2.80 | 7.88 | 0.15           | -0.35 | 3.38 | 0.01           | 3.74            | 4.81 | 0.50           | 7.08            | -9.39 | 0.38           |
| C20            | 0.11  | 1.33 | 0.00           | -1.04 | 5.44 | 0.07           | 0.79            | 2.18 | 0.14           | 2.38            | -3.11 | 0.34           |
| <b>Average</b> |       |      | 0.05           |       |      | 0.01           |                 |      | 0.15           |                 |       | 0.47           |
| <b>Min</b>     | -6.42 | 0.81 | 0.00           | -5.30 | 1.33 | 0.00           | -4.36           | 2.18 | 0.02           | 2.38            | -108  | 0.28           |
| <b>Max</b>     | 0.85  | 34.3 | 0.15           | 0.11  | 73.5 | 0.07           | 40.5            | 95.7 | 0.50           | 57.02           | 17.5  | 0.61           |

17

18  $C_{n\text{-alkanals}} = m C_{NO_x} + b$

| Carbon atoms   | EL    |      |                | MR              |      |                |                 |       |                |
|----------------|-------|------|----------------|-----------------|------|----------------|-----------------|-------|----------------|
|                | m     | b    | r <sup>2</sup> | Northerly Winds |      |                | Southerly winds |       |                |
|                |       |      |                | m               | b    | r <sup>2</sup> | m               | b     | r <sup>2</sup> |
| C10            | 0.44  | 10.4 | 0.16           | 0.11            | 83.2 | 0.01           | 0.36            | 13.0  | 0.42           |
| C11            | 0.16  | 1.48 | 0.13           | 0.01            | 25.6 | 0.01           | 0.11            | 1.73  | 0.49           |
| C12            | 0.06  | 5.51 | 0.01           | 0.14            | 13.1 | 0.19           | 0.18            | -2.49 | 0.45           |
| C13            | 0.08  | 2.92 | 0.07           | -0.02           | 35.3 | 0.01           | 0.14            | 1.35  | 0.38           |
| C14            | 0.03  | 3.59 | 0.02           | 0.15            | 12.1 | 0.23           | 0.13            | 4.64  | 0.35           |
| C15            | 0.00  | 6.14 | 0.00           | 0.20            | 39.9 | 0.15           | 0.14            | 47.4  | 0.15           |
| C16            | 0.07  | 1.72 | 0.07           | 0.18            | 17.0 | 0.20           | 0.11            | 11.0  | 0.12           |
| C17            | -0.09 | 7.04 | 0.05           | 0.08            | 4.19 | 0.28           | 0.05            | 11.4  | 0.11           |
| C18            | -0.49 | 34.1 | 0.09           | 0.02            | 5.64 | 0.03           | 0.07            | -8.65 | 0.30           |
| C19            | 0.05  | 6.24 | 0.02           | 3.74            | 4.81 | 0.50           | 0.07            | 1.14  | 0.23           |
| C20            | -0.06 | 6.33 | 0.03           | 0.00            | 3.28 | 0.01           | 0.03            | -2.08 | 0.24           |
| <b>Average</b> |       |      | 0.08           |                 |      | 0.15           |                 |       | 0.32           |
| <b>Min</b>     | -0.75 | 1.48 | 0.00           | -0.02           | 3.28 | 0.01           | 0.03            | -8.65 | 0.11           |
| <b>Max</b>     | 1.05  | 72.9 | 0.31           | 3.74            | 83.2 | 0.50           | 0.56            | 47.4  | 0.50           |

19

20

21 Table S5. Concentrations of PM<sub>10</sub> at the sampling sites.

22

| Sites     | PM <sub>10</sub> Range,<br>µg/m <sup>3</sup> | PM <sub>10</sub> Mean<br>µg/m <sup>3</sup> | Note                                                                                                                                                                                                                                         |
|-----------|----------------------------------------------|--------------------------------------------|----------------------------------------------------------------------------------------------------------------------------------------------------------------------------------------------------------------------------------------------|
| RU and WM | 10.8-72.4                                    | 34.1                                       | The sampling period was dominated by southerly winds and the data from London, North Kensington were used as this is an upwind urban background site.                                                                                        |
| EL        | 4.37-27.1                                    | 19.3                                       | The PM <sub>10</sub> data was obtained from the London North Kensington site (Defra), because the EL only have PM <sub>2.5</sub> data, and the PM <sub>2.5</sub> data of two site (EL and London North Kensington) were close to each other. |
| MR        | 12.6-78.7                                    | 30.7                                       | MR site                                                                                                                                                                                                                                      |

23

24

25 Table S6. Analysis of n-alkanals, alkan-2-ones and alkan-3-ones partitioning, all compounds, daily  
 26 data at RU, WM, El and MR sites.

| RU             |       |                                              |       |                |                                                 |       |                |                                                 |       |                |                        |       |                |
|----------------|-------|----------------------------------------------|-------|----------------|-------------------------------------------------|-------|----------------|-------------------------------------------------|-------|----------------|------------------------|-------|----------------|
| Date           | Temp  | alkanals (C <sub>10</sub> -C <sub>14</sub> ) |       |                | alkan-2-ones(C <sub>10</sub> -C <sub>18</sub> ) |       |                | alkan-3-ones(C <sub>10</sub> -C <sub>16</sub> ) |       |                | All Carbonyl compounds |       |                |
|                | °C    | m                                            | b     | r <sup>2</sup> | m                                               | b     | r <sup>2</sup> | m                                               | b     | r <sup>2</sup> | m                      | b     | r <sup>2</sup> |
| 26/01/2017     | 0.41  | -0.22                                        | -1.73 | 0.09           | -0.55                                           | -4.67 | 0.50           | -0.12                                           | -2.27 | 0.15           | -0.25                  | -2.80 | 0.11           |
| 27/01/2017     | 7.17  | -0.24                                        | -1.71 | 0.18           | -0.40                                           | -3.33 | 0.83           | -0.24                                           | -3.19 | 0.26           | -0.26                  | -2.58 | 0.19           |
| 28/01/2017     | 5.44  | -0.29                                        | -1.76 | 0.15           | -0.47                                           | -3.48 | 0.88           | -0.28                                           | -2.82 | 0.53           | -0.31                  | -2.54 | 0.34           |
| 29/01/2017     | 8.28  | -0.30                                        | -1.49 | 0.18           | -0.43                                           | -2.86 | 0.81           | -0.24                                           | -2.16 | 0.42           | -0.33                  | -2.20 | 0.41           |
| 03/02/2017     | 5.58  | -0.18                                        | -1.68 | 0.02           | -0.41                                           | -3.42 | 0.87           | -0.43                                           | -3.80 | 0.90           | -0.36                  | -3.08 | 0.45           |
| 04/02/2017     | 5.15  | -0.34                                        | -2.44 | 0.64           | -0.40                                           | -3.37 | 0.95           | -0.29                                           | -3.18 | 0.59           | -0.33                  | -2.93 | 0.55           |
| 05/02/2017     | 3.70  | -0.27                                        | -2.25 | 0.37           | -0.35                                           | -3.30 | 0.84           | -0.34                                           | -3.54 | 0.62           | -0.29                  | -2.90 | 0.50           |
| 06/02/2017     | 6.30  | -0.08                                        | -1.88 | 0.05           | -0.41                                           | -4.21 | 0.92           | -0.44                                           | -4.48 | 0.47           | -0.34                  | -3.67 | 0.53           |
| 07/02/2017     | 5.60  | -0.03                                        | -1.90 | 0.02           | -0.48                                           | -4.96 | 0.83           | -0.58                                           | -5.54 | 0.58           | -0.41                  | -4.38 | 0.57           |
| 08/02/2017     | 2.84  | -0.10                                        | -0.74 | 0.17           | -0.54                                           | -5.51 | 0.90           | -0.34                                           | -3.83 | 0.61           | -0.34                  | -3.77 | 0.48           |
| 09/02/2017     | 1.65  | -0.16                                        | -2.30 | 0.15           | -0.49                                           | -5.27 | 0.95           | -0.24                                           | -3.67 | 0.39           | -0.31                  | -3.86 | 0.47           |
| 10/02/2017     | 1.38  | -0.14                                        | -1.71 | 0.07           | -0.46                                           | -4.48 | 0.93           | -0.42                                           | -4.47 | 0.47           | -0.35                  | -3.61 | 0.44           |
| 11/02/2017     | 2.30  | -0.14                                        | -1.86 | 0.21           | -0.49                                           | -5.02 | 0.87           | -0.37                                           | -4.34 | 0.84           | -0.33                  | -3.74 | 0.45           |
| 12/02/2017     | 5.67  | -0.08                                        | -1.38 | 0.04           | -0.54                                           | -5.55 | 0.89           | -0.35                                           | -4.59 | 0.67           | -0.38                  | -4.41 | 0.55           |
| 13/02/2017     | 5.60  | -0.10                                        | -1.11 | 0.13           | -0.48                                           | -5.07 | 0.92           | -0.48                                           | -5.18 | 0.85           | -0.36                  | -4.25 | 0.53           |
| 14/02/2017     | 9.51  | -0.48                                        | -3.83 | 0.62           | -0.42                                           | -4.43 | 0.94           | -0.37                                           | -4.51 | 0.89           | -0.34                  | -3.87 | 0.51           |
| 15/02/2017     | 7.96  | -0.10                                        | -1.43 | 0.33           | -0.51                                           | -4.53 | 0.89           | -0.50                                           | -4.65 | 0.62           | -0.40                  | -3.69 | 0.54           |
| 17/02/2017     | 7.83  | -0.20                                        | -2.42 | 0.40           | -0.46                                           | -4.80 | 0.94           | -0.23                                           | -3.69 | 0.48           | -0.30                  | -3.63 | 0.43           |
| 18/02/2017     | 7.72  | -0.14                                        | -2.20 | 0.12           | -0.56                                           | -5.47 | 0.91           | -0.48                                           | -5.17 | 0.77           | -0.42                  | -4.42 | 0.57           |
| 19/02/2017     | 11.38 | -0.31                                        | -2.35 | 0.63           | -0.37                                           | -3.72 | 0.92           | -0.42                                           | -4.40 | 0.78           | -0.30                  | -5.20 | 0.42           |
| <b>Average</b> | 5.57  | -0.20                                        | -1.91 | 0.23           | -0.46                                           | -4.37 | 0.87           | -0.36                                           | -3.97 | 0.59           | -0.34                  | -3.58 | 0.45           |
| <b>MIN</b>     |       | -0.48                                        | -3.83 | 0.02           | -0.56                                           | -5.55 | 0.50           | -0.58                                           | -5.54 | 0.15           | -0.42                  | -5.20 | 0.11           |
| <b>MAX</b>     |       | -0.03                                        | -0.74 | 0.64           | -0.35                                           | -2.86 | 0.95           | -0.12                                           | -2.16 | 0.90           | -0.25                  | -2.20 | 0.57           |

27

| WM         |      |                                              |       |                |                                                 |       |                |                                                 |       |                |                        |       |                |
|------------|------|----------------------------------------------|-------|----------------|-------------------------------------------------|-------|----------------|-------------------------------------------------|-------|----------------|------------------------|-------|----------------|
| Date       | Temp | alkanals (C <sub>10</sub> -C <sub>14</sub> ) |       |                | alkan-2-ones(C <sub>10</sub> -C <sub>18</sub> ) |       |                | alkan-3-ones(C <sub>10</sub> -C <sub>16</sub> ) |       |                | All Carbonyl compounds |       |                |
|            | °C   | m                                            | b     | r <sup>2</sup> | m                                               | b     | r <sup>2</sup> | m                                               | b     | r <sup>2</sup> | m                      | b     | r <sup>2</sup> |
| 26/01/2017 | 0.41 | -0.34                                        | 0.46  | 0.97           | -0.41                                           | -4.36 | 0.73           | -0.39                                           | -4.60 | 0.55           | -0.24                  | -3.29 | 0.21           |
| 27/01/2017 | 7.17 | -0.17                                        | -1.95 | 0.20           | -0.59                                           | -5.44 | 0.93           | -0.54                                           | -4.96 | 0.63           | -0.43                  | -4.08 | 0.49           |
| 28/01/2017 | 5.44 | -0.15                                        | -1.32 | 0.31           | -0.35                                           | -2.90 | 0.88           | -0.44                                           | -3.42 | 0.84           | -0.32                  | -2.55 | 0.66           |
| 29/01/2017 | 8.28 | -0.15                                        | -1.35 | 0.35           | -0.30                                           | -2.63 | 0.58           | -0.42                                           | -3.45 | 0.40           | -0.22                  | -1.99 | 0.22           |
| 03/02/2017 | 5.58 | -0.14                                        | -1.11 | 0.31           | -0.46                                           | -3.05 | 0.90           | -0.19                                           | -2.26 | 0.22           | -0.34                  | -2.29 | 0.33           |
| 04/02/2017 | 5.15 | -0.06                                        | -1.12 | 0.11           | -0.44                                           | -3.87 | 0.87           | -0.03                                           | -1.07 | 0.43           | -0.24                  | -2.35 | 0.25           |
| 05/02/2017 | 3.70 | -0.06                                        | -1.24 | 0.14           | -0.36                                           | -2.77 | 0.87           | -0.09                                           | -1.72 | 0.17           | -0.24                  | -2.03 | 0.31           |
| 06/02/2017 | 6.30 | -0.04                                        | -1.02 | 0.11           | -0.33                                           | -3.02 | 0.51           | -0.14                                           | -0.51 | 0.21           | -0.14                  | -1.70 | 0.19           |



| WM             |       |                                              |       |                |                                                 |       |                |                                                 |       |                |                        |       |                |
|----------------|-------|----------------------------------------------|-------|----------------|-------------------------------------------------|-------|----------------|-------------------------------------------------|-------|----------------|------------------------|-------|----------------|
| Date           | Temp  | alkanals (C <sub>10</sub> -C <sub>14</sub> ) |       |                | alkan-2-ones(C <sub>10</sub> -C <sub>18</sub> ) |       |                | alkan-3-ones(C <sub>10</sub> -C <sub>16</sub> ) |       |                | All Carbonyl compounds |       |                |
|                | °C    | m                                            | b     | r <sup>2</sup> | m                                               | b     | r <sup>2</sup> | m                                               | b     | r <sup>2</sup> | m                      | b     | r <sup>2</sup> |
| 07/02/2017     | 5.60  | -0.08                                        | -1.85 | 0.09           | -0.43                                           | -4.68 | 0.86           | -0.21                                           | -3.15 | 0.32           | -0.27                  | -3.37 | 0.43           |
| 08/02/2017     | 2.84  | -0.27                                        | -2.47 | 0.29           | -0.44                                           | -4.17 | 0.91           | -0.56                                           | -5.16 | 0.92           | -0.39                  | -3.79 | 0.64           |
| 09/02/2017     | 1.65  | -0.12                                        | -1.30 | 0.16           | -0.39                                           | -3.48 | 0.92           | -0.29                                           | -3.09 | 0.24           | -0.31                  | -2.85 | 0.47           |
| 10/02/2017     | 1.38  | -0.20                                        | -2.03 | 0.53           | -0.42                                           | -4.23 | 0.95           | -0.28                                           | -3.34 | 0.46           | -0.30                  | -3.21 | 0.54           |
| 11/02/2017     | 2.30  | -0.01                                        | -1.33 | 0.28           | -0.44                                           | -4.55 | 0.89           | -0.16                                           | -2.37 | 0.35           | -0.27                  | -3.10 | 0.49           |
| 12/02/2017     | 5.67  | -0.24                                        | -2.61 | 0.17           | -0.44                                           | -4.65 | 0.88           | -0.42                                           | -4.77 | 0.55           | -0.34                  | -3.89 | 0.43           |
| 13/02/2017     | 5.60  | -0.05                                        | -1.12 | 0.11           | -0.43                                           | -4.44 | 0.88           | -0.33                                           | -3.99 | 0.52           | -0.31                  | -3.58 | 0.48           |
| 14/02/2017     | 9.51  | -0.03                                        | -1.66 | 0.09           | -0.38                                           | -4.61 | 0.88           | -0.11                                           | -2.61 | 0.23           | -0.21                  | -3.23 | 0.35           |
| 15/02/2017     | 7.96  | -0.07                                        | -1.17 | 0.12           | -0.36                                           | -3.24 | 0.93           | -0.53                                           | -4.47 | 0.77           | -0.33                  | -3.00 | 0.54           |
| 16/02/2017     | 9.27  | -0.35                                        | -2.66 | 0.40           | -0.35                                           | -3.40 | 0.85           | -0.39                                           | -3.81 | 0.78           | -0.30                  | -2.96 | 0.51           |
| 17/02/2017     | 7.83  | -0.25                                        | -2.43 | 0.23           | -0.35                                           | -3.99 | 0.86           | -0.40                                           | -4.51 | 0.51           | -0.28                  | -3.34 | 0.33           |
| 18/02/2017     | 7.72  | -0.30                                        | -2.96 | 0.26           | -0.37                                           | -4.30 | 0.85           | -0.35                                           | -4.01 | 0.61           | -0.28                  | -3.44 | 0.43           |
| 19/02/2017     | 11.38 | -0.22                                        | -1.24 | 0.21           | -0.51                                           | -4.11 | 0.88           | -0.48                                           | -3.82 | 0.81           | -0.40                  | -3.24 | 0.61           |
| <b>Average</b> | 6.02  | -0.16                                        | -1.59 | 0.26           | -0.41                                           | -3.90 | 0.85           | -0.32                                           | -3.39 | 0.50           | -0.29                  | -3.01 | 0.42           |
| <b>MIN</b>     |       | -0.35                                        | -2.96 | 0.09           | -0.59                                           | -5.44 | 0.51           | -0.56                                           | -5.16 | 0.17           | -0.43                  | -4.08 | 0.19           |
| <b>MAX</b>     |       | -0.01                                        | 0.46  | 0.97           | -0.30                                           | -2.63 | 0.95           | -0.03                                           | -0.51 | 0.92           | -0.14                  | -1.70 | 0.66           |

28

| EL         |      |                                              |       |                |                                                 |       |                |                                                 |       |                |                        |       |                |
|------------|------|----------------------------------------------|-------|----------------|-------------------------------------------------|-------|----------------|-------------------------------------------------|-------|----------------|------------------------|-------|----------------|
| Date       | Temp | alkanals (C <sub>10</sub> -C <sub>14</sub> ) |       |                | alkan-2-ones(C <sub>10</sub> -C <sub>18</sub> ) |       |                | alkan-3-ones(C <sub>10</sub> -C <sub>16</sub> ) |       |                | All Carbonyl compounds |       |                |
|            | °C   | m                                            | b     | r <sup>2</sup> | m                                               | b     | r <sup>2</sup> | m                                               | b     | r <sup>2</sup> | m                      | b     | r <sup>2</sup> |
| 23/02/2017 | 5.20 | -0.13                                        | -0.59 | 0.16           | -0.34                                           | -2.45 | 0.72           | -0.32                                           | -2.62 | 0.53           | -0.26                  | -1.89 | 0.39           |
| 24/02/2017 | 5.58 | -0.05                                        | -0.78 | 0.11           | -0.39                                           | -3.03 | 0.77           | -0.39                                           | -3.07 | 0.76           | -0.28                  | -2.14 | 0.43           |
| 25/02/2017 | 9.36 | -0.01                                        | -0.82 | 0.09           | -0.29                                           | -1.40 | 0.60           | -0.22                                           | -1.2  | 0.10           | -0.19                  | -0.66 | 0.16           |
| 26/02/2017 | 9.82 | -0.07                                        | -0.26 | 0.05           | -0.37                                           | -2.48 | 0.85           | -0.26                                           | -1.69 | 0.24           | -0.27                  | -1.66 | 0.44           |
| 27/02/2017 | 4.16 | -0.07                                        | -0.16 | 0.08           | -0.54                                           | -3.71 | 0.90           | -0.22                                           | -1.48 | 0.01           | -0.30                  | -2.04 | 0.35           |
| 28/02/2017 | 5.55 | -0.32                                        | -2.40 | 0.42           | -0.53                                           | -4.6  | 0.94           | -0.11                                           | -1.82 | 0.14           | -0.32                  | -2.99 | 0.49           |
| 01/03/2017 | 6.57 | -0.26                                        | -1.50 | 0.69           | -0.48                                           | -3.68 | 0.87           | -0.37                                           | -5.07 | 0.71           | -0.36                  | -2.71 | 0.57           |
| 02/03/2017 | 5.77 | -0.21                                        | -1.61 | 0.56           | -0.48                                           | -3.47 | 0.91           | -0.34                                           | -2.81 | 0.46           | -0.40                  | -2.90 | 0.69           |
| 03/03/2017 | 8.09 | -0.16                                        | 0.55  | 0.64           | -0.17                                           | -2.13 | 0.46           | -0.13                                           | -2.61 | 0.08           | -0.10                  | -1.81 | 0.06           |
| 04/03/2017 | 6.98 | -0.09                                        | -0.32 | 0.16           | -0.32                                           | -2.65 | 0.77           | -0.15                                           | -1.24 | 0.12           | -0.11                  | -1.17 | 0.10           |
| 05/03/2017 | 6.19 | -0.24                                        | -1.27 | 0.35           | -0.45                                           | -3.25 | 0.9            | -0.05                                           | -0.90 | 0.04           | -0.27                  | -1.96 | 0.42           |
| 06/03/2017 | 5.13 | -0.13                                        | -1.18 | 0.19           | -0.37                                           | -3.28 | 0.71           | -0.17                                           | -1.86 | 0.20           | -0.24                  | -2.18 | 0.37           |
| 07/03/2017 | 8.12 | -0.16                                        | -0.33 | 0.21           | -0.28                                           | -1.97 | 0.71           | -0.22                                           | -1.7  | 0.21           | -0.17                  | -1.07 | 0.17           |
| 08/03/2017 | 9.89 | -0.05                                        | -0.74 | 0.03           | -0.41                                           | -3.40 | 0.84           | -0.28                                           | -2.58 | 0.31           | -0.29                  | -2.45 | 0.44           |
| 09/03/2017 | 6.83 | -0.09                                        | -0.39 | 0.70           | -0.21                                           | -1.73 | 0.53           | -0.18                                           | -1.98 | 0.19           | -0.14                  | -1.28 | 0.14           |
| 10/03/2017 | 7.69 | -0.01                                        | -0.79 | 0.33           | -0.12                                           | -1.32 | 0.37           | -0.19                                           | -2.05 | 0.61           | -0.09                  | -1.11 | 0.10           |
| 11/03/2017 | 7.12 | -0.32                                        | -1.74 | 0.35           | -0.12                                           | -1.16 | 0.33           | -0.21                                           | -2.17 | 0.18           | -0.14                  | -1.27 | 0.13           |

| EL             |       |                                              |       |                |                                                 |       |                |                                                 |       |                |                        |       |                |
|----------------|-------|----------------------------------------------|-------|----------------|-------------------------------------------------|-------|----------------|-------------------------------------------------|-------|----------------|------------------------|-------|----------------|
| Date           | Temp  | alkanals (C <sub>10</sub> -C <sub>14</sub> ) |       |                | alkan-2-ones(C <sub>10</sub> -C <sub>18</sub> ) |       |                | alkan-3-ones(C <sub>10</sub> -C <sub>16</sub> ) |       |                | All Carbonyl compounds |       |                |
|                | °C    | m                                            | b     | r <sup>2</sup> | m                                               | b     | r <sup>2</sup> | m                                               | b     | r <sup>2</sup> | m                      | b     | r <sup>2</sup> |
| 12/03/2017     | 7.50  | -0.23                                        | -1.19 | 0.79           | -0.10                                           | -0.63 | 0.16           | -0.30                                           | -2.49 | 0.22           | -0.09                  | -0.93 | 0.03           |
| 13/03/2017     | 8.21  | -0.06                                        | 0.20  | 0.01           | -0.30                                           | -1.94 | 0.84           | -0.19                                           | -1.79 | 0.23           | -0.22                  | -1.37 | 0.23           |
| 14/03/2017     | 7.88  | -0.11                                        | 1.25  | 0.10           | -0.08                                           | -0.81 | 0.12           | -0.25                                           | -2.20 | 0.28           | -0.07                  | -0.74 | 0.04           |
| 15/03/2017     | 8.04  | -0.14                                        | -1.07 | 0.21           | -0.18                                           | -1.43 | 0.54           | -0.34                                           | -2.84 | 0.45           | -0.21                  | -1.72 | 0.35           |
| 16/03/2017     | 7.37  | -0.16                                        | -1.04 | 0.07           | -0.38                                           | -3.56 | 0.54           | -0.13                                           | -1.88 | 0.12           | -0.19                  | -2.01 | 0.14           |
| 17/03/2017     | 10.23 | -0.50                                        | -1.96 | 0.77           | -0.21                                           | -1.93 | 0.37           | -0.11                                           | -1.39 | 0.07           | -0.12                  | -1.05 | 0.05           |
| 18/03/2017     | 11.11 | -0.35                                        | -1.97 | 0.24           | -0.30                                           | -2.79 | 0.49           | -0.74                                           | -5.47 | 0.83           | -0.27                  | -2.40 | 0.25           |
| 19/03/2017     | 11.14 | -0.28                                        | -1.08 | 0.38           | -0.19                                           | -1.76 | 0.60           | -0.11                                           | -1.49 | 0.04           | -0.08                  | -0.87 | 0.03           |
| 21/03/2017     | 6.53  | -0.19                                        | -0.64 | 0.89           | -0.17                                           | -1.12 | 0.55           | -0.06                                           | -0.91 | 0.01           | -0.09                  | -0.59 | 0.05           |
| <b>Average</b> | 7.82  | -0.17                                        | -0.84 | 0.33           | -0.30                                           | -2.37 | 0.63           | -0.23                                           | -2.20 | 0.27           | -0.20                  | -1.65 | 0.25           |
| <b>MIN</b>     |       | -0.50                                        | -2.40 | 0.01           | -0.54                                           | -4.60 | 0.12           | -0.74                                           | -5.47 | 0.01           | -0.40                  | -2.99 | 0.03           |
| <b>MAX</b>     |       | -0.01                                        | 1.25  | 0.89           | -0.08                                           | -0.63 | 0.94           | -0.05                                           | -0.90 | 0.83           | -0.07                  | -0.59 | 0.69           |

29

| MR         |       |                                              |       |                |                                                 |       |                |                                                 |       |                |                        |       |                |
|------------|-------|----------------------------------------------|-------|----------------|-------------------------------------------------|-------|----------------|-------------------------------------------------|-------|----------------|------------------------|-------|----------------|
| Date       | Temp  | alkanals (C <sub>10</sub> -C <sub>14</sub> ) |       |                | alkan-2-ones(C <sub>10</sub> -C <sub>18</sub> ) |       |                | alkan-3-ones(C <sub>10</sub> -C <sub>16</sub> ) |       |                | All Carbonyl compounds |       |                |
|            | °C    | m                                            | b     | r <sup>2</sup> | m                                               | b     | r <sup>2</sup> | m                                               | b     | r <sup>2</sup> | m                      | b     | r <sup>2</sup> |
| 22/03/2017 | 8.01  | -0.32                                        | -1.47 | 0.88           | -0.16                                           | -1.24 | 0.18           | -0.66                                           | -5.40 | 0.76           | -0.25                  | -2.03 | 0.14           |
| 23/03/2017 | 8.64  | -0.38                                        | -1.76 | 0.57           | -0.29                                           | -2.48 | 0.45           | -0.40                                           | -3.94 | 0.87           | -0.23                  | -2.07 | 0.13           |
| 24/03/2017 | 9.01  | -0.25                                        | -1.86 | 0.81           | -0.29                                           | -2.71 | 0.45           | -0.37                                           | -3.69 | 0.80           | -0.26                  | -2.56 | 0.34           |
| 25/03/2017 | 10.08 | -0.47                                        | -2.77 | 0.57           | -0.31                                           | -2.48 | 0.56           | -0.45                                           | -4.26 | 0.88           | -0.32                  | -2.73 | 0.33           |
| 26/03/2017 | 9.95  | -0.15                                        | -1.31 | 0.33           | -0.30                                           | -2.36 | 0.61           | -0.62                                           | -5.11 | 0.78           | -0.31                  | -2.51 | 0.28           |
| 27/03/2017 | 10.47 | -0.17                                        | -1.89 | 0.21           | -0.41                                           | -3.56 | 0.77           | -0.39                                           | -3.98 | 0.60           | -0.38                  | -3.45 | 0.58           |
| 28/03/2017 | 13.05 | -0.18                                        | -0.84 | 0.58           | -0.34                                           | -2.20 | 0.68           | -0.42                                           | -3.66 | 0.80           | -0.34                  | -2.35 | 0.36           |
| 29/03/2017 | 13.74 | -0.45                                        | -2.07 | 0.65           | -0.23                                           | -1.73 | 0.40           | -0.28                                           | -2.77 | 0.72           | -0.23                  | -1.78 | 0.20           |
| 30/03/2017 | 15.45 | -0.28                                        | -1.76 | 0.69           | -0.29                                           | -2.29 | 0.65           | -0.65                                           | -4.92 | 0.85           | -0.34                  | -2.65 | 0.44           |
| 31/03/2017 | 11.94 | -0.59                                        | -3.05 | 0.81           | -0.28                                           | -2.15 | 0.83           | -0.30                                           | -3.0  | 0.79           | -0.27                  | -2.15 | 0.33           |
| 01/04/2017 | 10.82 | -0.23                                        | -1.50 | 0.45           | -0.17                                           | -1.86 | 0.26           | -0.61                                           | -5.32 | 0.84           | -0.23                  | -2.35 | 0.17           |
| 02/04/2017 | 11.08 | -0.35                                        | -2.55 | 0.77           | -0.29                                           | -2.59 | 0.6            | -0.35                                           | -3.85 | 0.47           | -0.29                  | -2.82 | 0.34           |
| 03/04/2017 | 12.29 | -0.23                                        | -1.71 | 0.39           | -0.14                                           | -1.45 | 0.20           | -0.33                                           | -3.43 | 0.79           | -0.19                  | -2.01 | 0.2            |
| 04/04/2017 | 10.76 | -0.17                                        | -0.77 | 0.15           | -0.26                                           | -1.79 | 0.49           | -0.30                                           | -2.83 | 0.84           | -0.23                  | -1.72 | 0.23           |
| 05/04/2017 | 10.83 | -0.43                                        | -2.20 | 0.91           | -0.16                                           | -1.20 | 0.22           | -0.36                                           | -3.61 | 0.78           | -0.21                  | -1.85 | 0.15           |
| 06/04/2017 | 12.00 | -0.14                                        | -0.90 | 0.40           | -0.36                                           | -2.64 | 0.63           | -0.32                                           | -3.19 | 0.61           | -0.22                  | -2.08 | 0.24           |
| 07/04/2017 | 12.38 | -0.32                                        | -3.09 | 0.90           | -0.25                                           | -2.81 | 0.59           | -0.43                                           | -5.03 | 0.29           | -0.31                  | -3.54 | 0.27           |
| 08/04/2017 | 15.34 | -0.17                                        | -1.58 | 0.07           | -0.29                                           | -2.91 | 0.47           | -0.33                                           | -3.68 | 0.59           | -0.23                  | -2.65 | 0.23           |
| 09/04/2017 | 15.11 | -0.18                                        | -1.58 | 0.19           | -0.19                                           | -1.84 | 0.37           | -0.65                                           | -5.45 | 0.91           | -0.30                  | -2.73 | 0.31           |
| 10/04/2017 | 10.42 | -0.16                                        | -1.02 | 0.23           | -0.26                                           | -1.67 | 0.65           | -0.52                                           | -4.56 | 0.94           | -0.33                  | -2.51 | 0.33           |
| 11/04/2017 | 11.30 | -0.15                                        | -1.31 | 0.51           | -0.27                                           | -2.32 | 0.57           | -0.58                                           | -4.99 | 0.87           | -0.32                  | -2.77 | 0.38           |

| MR             |       |                                              |       |                |                                                 |       |                |                                                 |       |                |                        |       |                |
|----------------|-------|----------------------------------------------|-------|----------------|-------------------------------------------------|-------|----------------|-------------------------------------------------|-------|----------------|------------------------|-------|----------------|
| Date           | Temp  | alkanals (C <sub>10</sub> -C <sub>14</sub> ) |       |                | alkan-2-ones(C <sub>10</sub> -C <sub>18</sub> ) |       |                | alkan-3-ones(C <sub>10</sub> -C <sub>16</sub> ) |       |                | All Carbonyl compounds |       |                |
|                | °C    | m                                            | b     | r <sup>2</sup> | m                                               | b     | r <sup>2</sup> | m                                               | b     | r <sup>2</sup> | m                      | b     | r <sup>2</sup> |
| 12/04/2017     | 11.75 | -0.11                                        | -0.69 | 0.28           | -0.35                                           | -2.37 | 0.58           | -0.34                                           | -3.19 | 0.84           | -0.27                  | -2.05 | 0.25           |
| 13/04/2017     | 11.20 | -0.02                                        | -0.29 | 0.03           | -0.24                                           | -2.04 | 0.56           | -0.50                                           | -4.52 | 0.78           | -0.24                  | -2.23 | 0.22           |
| 14/04/2017     | 11.96 | -0.11                                        | -0.57 | 0.2            | -0.31                                           | -2.63 | 0.68           | -0.28                                           | -3.07 | 0.66           | -0.23                  | -2.17 | 0.27           |
| 15/04/2017     | 10.68 | -0.14                                        | -0.72 | 0.15           | -0.24                                           | -1.83 | 0.22           | -0.43                                           | -4.08 | 0.44           | -0.25                  | -2.11 | 0.14           |
| 16/04/2017     | 10.96 | -0.02                                        | 0.44  | 0.02           | -0.17                                           | -0.90 | 0.23           | -0.36                                           | -3.42 | 0.68           | -0.20                  | -1.44 | 0.12           |
| 18/04/2017     | 9.01  | -0.13                                        | -0.58 | 0.04           | -0.30                                           | -2.03 | 0.67           | -0.37                                           | -3.34 | 0.92           | -0.27                  | -2.03 | 0.29           |
| <b>Average</b> | 11.95 | -0.23                                        | -1.46 | 0.44           | -0.26                                           | -2.15 | 0.50           | -0.43                                           | -4.01 | 0.74           | -0.27                  | -2.35 | 0.27           |
| <b>MIN</b>     |       | -0.59                                        | -3.09 | 0.02           | -0.41                                           | -3.56 | 0.18           | -0.66                                           | -5.45 | 0.29           | -0.38                  | -3.54 | 0.12           |
| <b>MAX</b>     |       | -0.02                                        | 0.44  | 0.91           | -0.14                                           | -0.90 | 0.83           | -0.28                                           | -2.77 | 0.94           | -0.19                  | -1.44 | 0.58           |

30
